# Supplementary material for: SNP Discovery in European Anchovy (Engraulis encrasicolus, L) by High-Throughput Transcriptome and Genome Sequencing
Source: PubMed Central journal article supplement (PMC3731364; doi:10.1371/journal.pone.0070051), 2013-08-01

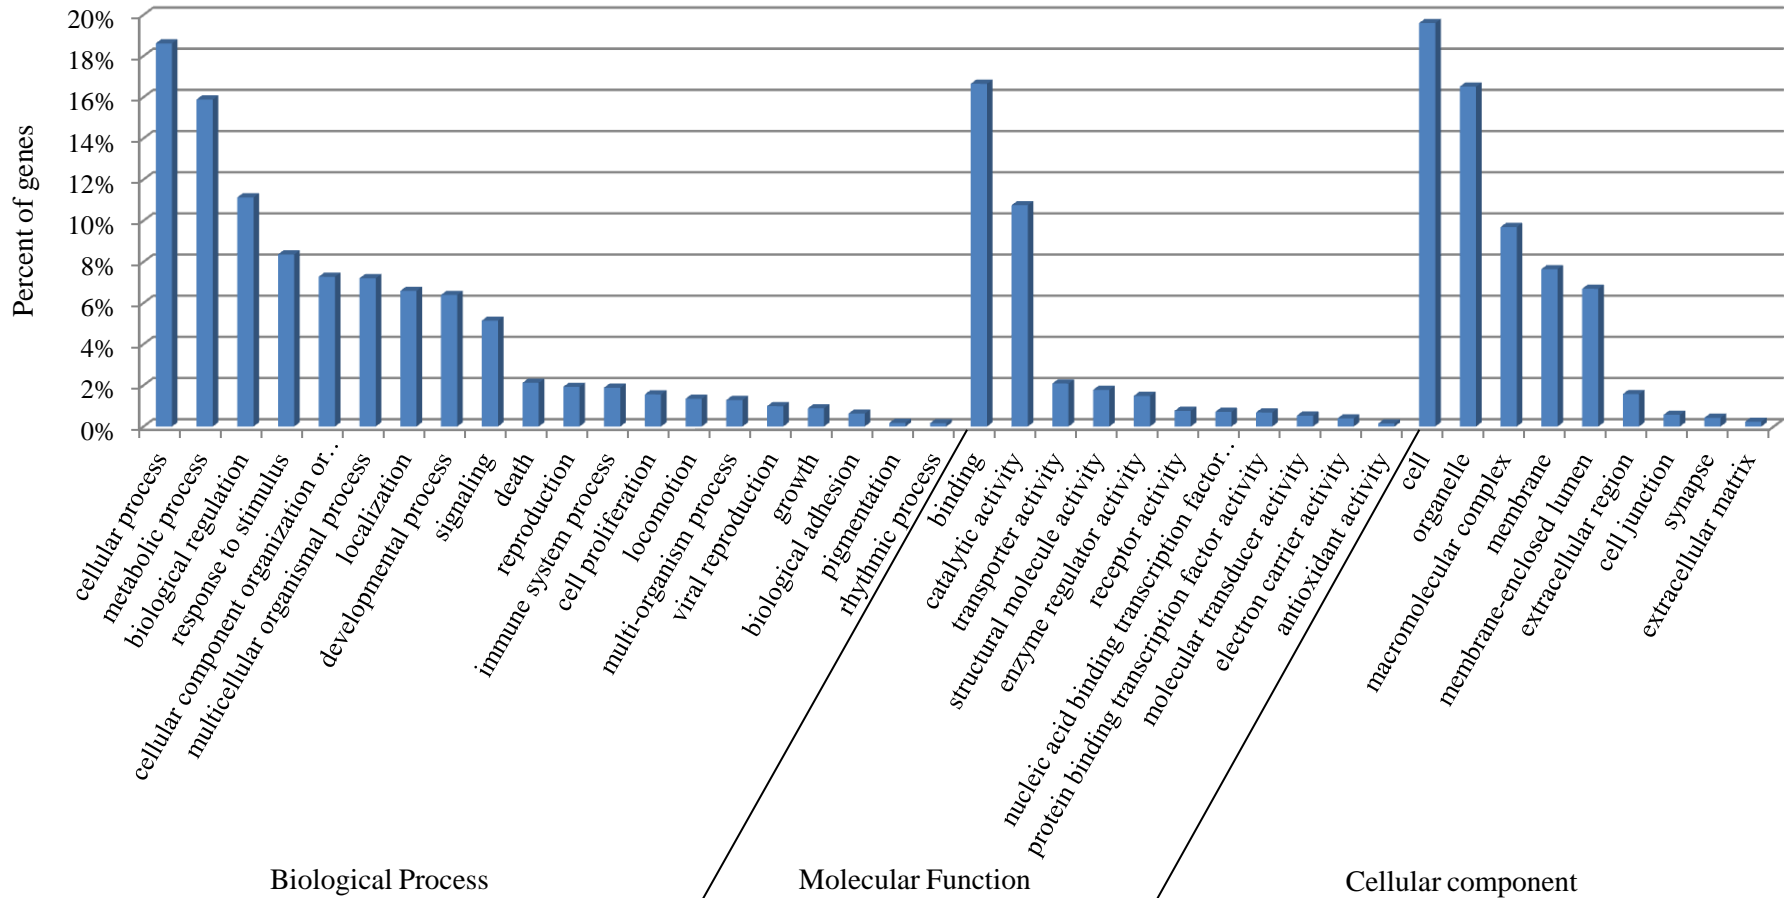

Supplement: pone.0070051.s003.pdf [file pone.0070051.s003.pdf]
